# Supplementary material
Source: publisher figshare collection journal article supplement (https://frontiersin.figshare.com/ndownloader/files/26060729)

**Figure S4** Respiratory quinones in *G. groenlandica*. The well-characterized *Micrococcus luteus* was used as reference.

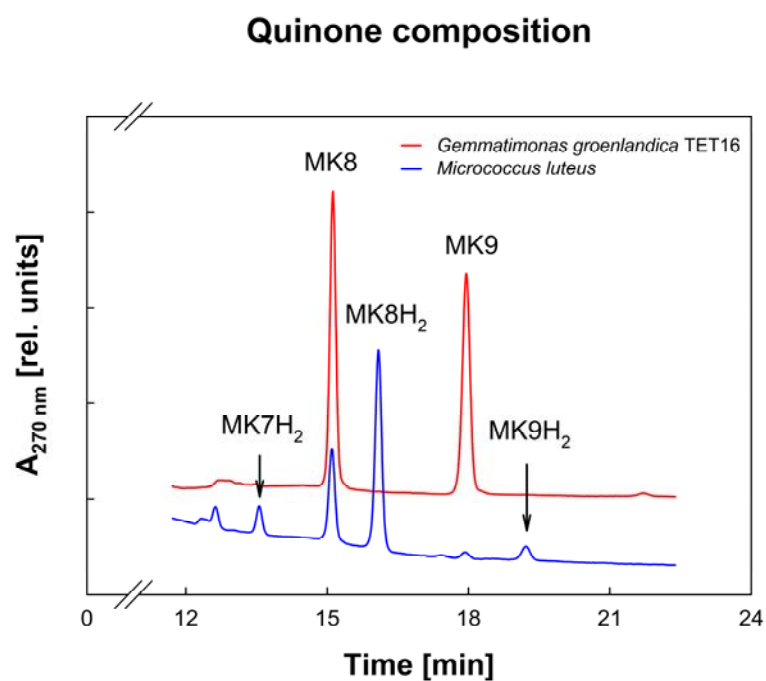

Supplement: Supplementary file [file 26060729]
